# Supplementary figures and images for: Immediate analgesic effect of acupuncture intervention within 10 min during acute migraine attacks: protocol of a randomised controlled trial
Source: HighWire-hosted journal article supplement (doi:10.1136/bmjopen-2023-075715), 2023-09-01

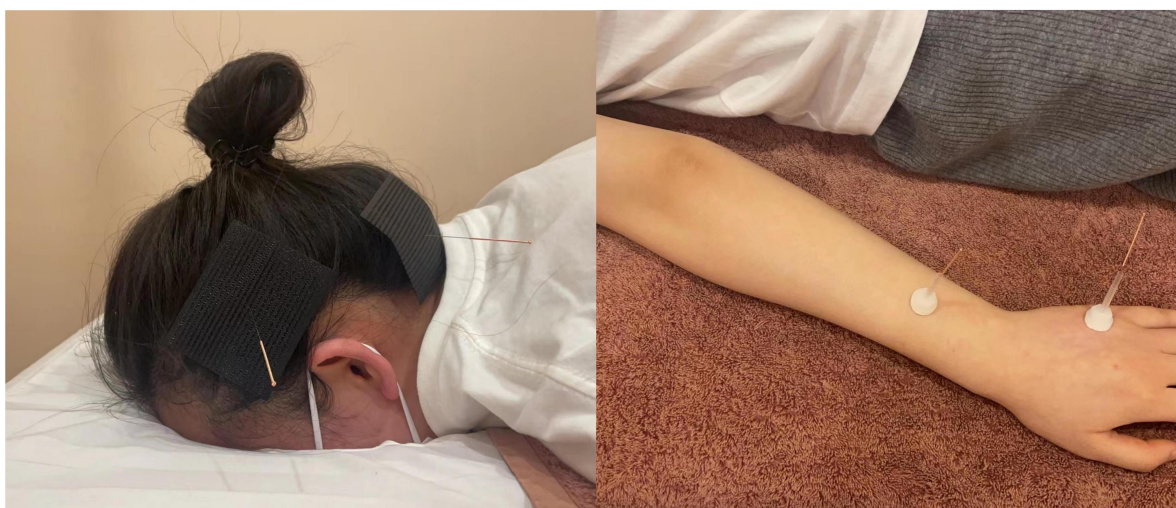

Hairpins to hold hair and needle

Park sham acupuncture device

Supplement: bmjopen-2023-075715supp005_data_supplement.pdf [file bmjopen-2023-075715supp005_data_supplement.pdf]
